# Supplementary material for: The challenge of uncertainty: can sustainability be achieved under unpredictable ecological dynamics?
Source: Research Square preprint supplement (doi:10.21203/rs.3.rs-4369533/v1), 2024-07-01
Supplement: Supplementary file 1 [file 7a6be961e57b2380bffaaaeb.docx]

Figure S1: List of all experts that we interviewed through the structured expert elucidation protocol.

| ID | Role | Years of Experience (~) | Gender | Nationality | Human Group | Socio Ecological System |
| --- | --- | --- | --- | --- | --- | --- |
| 1 | Researcher | 10 | Male | British | Agta | HP – Agta, hunting |
| 2 | Researcher | 10 | Male | British | Agta | HP – Agta, hunting |
| 3 | Researcher | 10 | Female | British | Agta | HP – Agta, hunting |
| 4 | Practitioner | 10 | Female | Honduras | Garifuna | FH – Garifuna, fishing, |
| 5 | Practitioner | 10 | Female | Honduras | Garifuna | FH – Garifuna, fishing, |
| 6 | Practitioner | 10 | Male | Honduras | Garifuna | FH – Garifuna, fishing, |
| 7 | Practitioner | 10 | Male | Honduras | Garifuna | FH – Garifuna, fishing, |
| 8 | Researcher | 15 | Male | British | Garifuna | FH – Garifuna, fishing, |
| 9 | Researcher | 15 | Female | British | Maasai | PW – Maasai, pastoralists, wet period, PD – Maasai, pastoralists dry period |
| 10 | Researcher | 30 | Female | British | Maasai | PW – Maasai, pastoralists, wet period, PD – Maasai, pastoralists dry period |
| 11 | Local Person | 30 | Male | Tanzania | Maasai | PW – Maasai, pastoralists, wet period, PD – Maasai, pastoralists dry period |
| 12 | Researcher | 40 | Male | Brazil | Pantaneiros | FP – Pantaneiros, fishing, Brazil |
| 13 | Researcher | 30 | Male | Brazil | Pantaneiros | FP – Pantaneiros, fishing, Brazil |
| 14 | Researcher | 30 | Female | Brazil | Pantaneiros | FP – Pantaneiros, fishing, Brazil |
| 15 | Practitioner | 30 | Female | Brazil | Pantaneiros | FP – Pantaneiros, fishing, Brazil |
| 16 | Researcher | 15 | Male | Brazil | Pantaneiros | FP – Pantaneiros, fishing, Brazil |
| 17 | Practitioner | 15 | Female | Brazil | Traditional Amazonians | AA – Traditional Amazonias, *arapaima* fishing |
| 18 | Practitioner | 10 | Female | Brazil | Traditional Amazonians | AA – Traditional Amazonias, *arapaima* fishing |
| 19 | Practitioner | 10 | Female | Brazil | Traditional Amazonians | AA – Traditional Amazonias, *arapaima* fishing |
| 20 | Local Person | 30 | Male | Brazil | Traditional Amazonians | AA – Traditional Amazonias, *arapaima* fishing |
| 21 | Practitioner | 10 | Female | Brazil | Traditional Amazonians | AA – Traditional Amazonias, *arapaima* fishing |
| 22 | Researcher | 15 | Male | Brazil | Traditional Amazonians | HLA – Traditional Amazonians, hunting large game; HAS – Traditional Amazonians, hunting small game in croplands, |
| 23 | Researcher | 15 | Male | Brazil | Traditional Amazonians | HLA – Traditional Amazonians, hunting large game; HAS – Traditional Amazonians, hunting small game in croplands, |
| 24 | Researcher | 15 | Male | Brazil | Traditional Amazonians | HLA – Traditional Amazonians, hunting large game; HAS – Traditional Amazonians, hunting small game in croplands, |
| 25 | Researcher | 15 | Male | British | Traditional Amazonians | HLA – Traditional Amazonians, hunting large game; HAS – Traditional Amazonians, hunting small game in croplands, |
| 26 | Local Person | 50 | Male | Brazil | Traditional Amazonians | HLA – Traditional Amazonians, hunting large game; BA – Traditional Amazonians, harvesting, Brazil |
| 27 | Researcher | 15 | Male | Brazil | Traditional Amazonians | HLA – Traditional Amazonians, hunting large game; HAS – Traditional Amazonians, hunting small game in croplands, |
| 28 | Researcher | 15 | Female | Brazil | Traditional Amazonians | HAS – Traditional Amazonians, hunting small game in croplands, |
| 29 | Researcher | 15 | Female | Brazil | Traditional Amazonians | BA – Traditional Amazonians, harvesting, Brazil |
| 30 | Local Person | 65 | Male | Brazil | Traditional Amazonians | BA – Traditional Amazonians, harvesting, Brazil |
| 31 | Practitioner | 10 | Female | Brazil | Traditional Amazonians | BA – Traditional Amazonians, harvesting, Brazil |
| 32 | Researcher | 30 | Female | Brazil | Traditional Amazonians | BA – Traditional Amazonians, harvesting, Brazil |
| 33 | Local Person | 20 | Male | Tanzania | Warufiji | RL – Warufiji, fishing lakes, RR – Warufiji, wet season floodplain fishing |
| 34 | Researcher | 15 | Female | British | Warufiji | RL – Warufiji, fishing lakes, RR – Warufiji, wet season floodplain fishing |
| 35 | Researcher | 20 | Male | French | Warufiji | RL – Warufiji, fishing lakes, RR – Warufiji, wet season floodplain fishing |
