# Supplementary material for: The challenge of uncertainty: can sustainability be achieved under unpredictable ecological dynamics?
Source: Research Square preprint supplement (doi:10.21203/rs.3.rs-4369533/v1), 2024-07-01
Supplement: Supplementary file 2 [file a13c5c7fc99bc41a4a98e2a7.docx]

**Supplementary material – Detailed description of each Socio-Ecological System evaluated in the paper**

1. **Maasai pastoralists**

Maasai pastoralists have for centuries occupied some 150,000-200,000km2 of East African savannas, centred on a broad cross section of the Great African Rift Valley and associated highlands, straddling the present-day Tanzania/ Kenya border 1. Rainfall is bimodal, dominated by the Intertropical Convergence Zone, but geographical relations and global atmospheric circulation patterns mean that precipitation is very low and unpredictable. This makes for arid and semi-arid grasslands which are seasonally highly productive, given the Rift’s fertile volcanic soils, supporting large populations of both wildlife and livestock. The mosaic of geology, topography, soils, surface water patterns, and patchy rainfall make for great ecological diversity with a patchwork of savanna grassland, Acacia-dominated woodlands, wetlands and forested highland areas2. Pastoralist and wildlife populations have for millennia moved seasonally around this landscape, shifting between wet season dispersal areas and dry season swamp or highland refuges with permanent water. Wild and domestic herds exploit this landscape diversity to access patchily changing forage resources, to balance their needs for forage quantity and nutritional quality, and to avoid disease. Maasai lifeways have historically focused around seasonal transhumance with their livestock, especially cattle, with different Maa-speaking groups complementing herding with farming (e.g. Il Parakuyo) fishing (e.g.Il Chamus), gathering and hunting (e.g. Ndorobo) 1. In the present day, in-migration, farming, wildlife conservation and tourism, mining and urban settlement increasingly contest and constrain pastoralist resource access and use.

Customary Maasai social and spatial structures co-evolved over centuries with livestock mobility and redistribution to characterize their pastoralism in the face of unpredictability. The Maasai comprise different socially and spatially defined sections (oloshon) and would only access or graze their livestock in another section’s territory with special permission under extreme circumstances. Each section divides into localities (enkutot), often corresponding to watershed divisions encompassing a range of wet and dry season resources adequate for transhumance in most years. Within a locality, scattered clusters of homesteads controlled local grazing, with individual families maintaining rights over specific springs or hand-dug wells 3.

Maasai families were customarily patriarchal, polygynous and gerontocratic, with girls married away to older men years their senior, and treated as lifelong juridical minors. Division of labour was (and often remains) both gender- and age-related. Women managed household chores, milking and food preparation, children, and sick people or animals. Men managed livestock, financial and political affairs. A man’s life was historically divided into phases in which he, in step with his peer group, moved progressively through a series of stages, from herdboy, to warrior (ilmurran), to elder in charge of economic decisions within and political negotiations beyond the family. Each transition was marked by powerful, section-wide ceremonies. Every fifteen years or so, the section would ritually open a new ageset, into which boys reaching puberty would be circumcised. The emerging ageset would increasingly challenge established warriors, and eventually be promoted to junior warrior status. Their immediate seniors then moved to be senior warriors, former senior warriors to junior elders, and former junior elders to senior elder status. Ilmurran lived and operated as a group. As well as carrying out difficult and dangerous herding tasks, moving animals over long distances to grazing, watering or markets, they policed grazing regulations, defended against predators and raiders (while themselves raiding in their turn), travelling widely, learning the geography of their own section and beyond, sharing songs, dances and trials of strength. They formed bonds of friendship sealed with gifts of livestock. As they progressed to become elders, men increasingly spent their time moving between widely dispersed homesteads, or meeting at regular markets, to discuss and negotiate resource management and access alongside other social, political and economic matters for family and section, while their sons took over the more physical responsibilities. All these activities underpinned pastoralism in an unpredictable landscape 4.

The extended family (Olmarei) often encompasses multilocal interdependent households, while clan relationships, inherited from the father, cut across sections, providing an additional framework for support. Individual homesteads (enkang) customarily comprised several families – for example a father, his grown sons, their wives, children and dependants. Each adult male would have his own stockade around the central livestock corrals, and each wife would build her own hut (aji) for herself and her children within her husband’s stockade, its position dictated by her status. In many cases stock friends would build adjacent or conjoined homesteads with separate gates for their individual herds, co-managing their livestock and labour for all or part of the seasonal cycle 4.

In pre-colonial times, access to and use of Maasai-dominated lands were primarily governed through these social networks of section, location, clan, kin and peer group friendships. Channels of communication and mechanisms of negotiation within the landscape-wide cultural and personal familiarities forged by *ilmurran* travel and friendships allowed for lifelong flexible, reciprocal social and spatial patterns of access across Maasailand. Many of these features still in evidence in the 1970s and 1980s have been suppressed by national policies, or abandoned as impractical in the face of changing educational practices and diversifying livelihoods. However, the landscape-wide perspective, peer group cohesion and strong sense of identity fostered by the ageset system and social significance of the  *ilmurran* role remain deep-rooted values, as do the cultural ideals of reciprocity which it fostered. Long-established customs of information sharing on key resources, market prices and threats of disease, predators or raiders are increasingly facilitated by mobile phones.

Structures of section and locality have been much changed by colonial and post-independence policies. In Kenya, the Maasai Moves 5, group ranches 6, privatization policies 7 reshaped the landscape of access. In Tanzania, state appropriation of all land and subsequent villagization granted rights of occupancy to *ujamaa* villages and parastatals, over-riding customary tenure ((Shivji 1995, 1998), URT Village Land Act, 1999). Across Maasailand, customary Maasai patterns of common property resource management, tenure and access are being radically over-written. Conservation set-aside - national protected areas, Kenya’s proliferating conservancies 10 and Tanzania’s wildlife management areas, tourism and hunting concessions (Ngorongoro; Loliondo11) – alongside in-migration of non-Maasai, the spread of agribusiness, irrigated cultivation, urban settlement, development infrastructure and mining are fragmenting the landscape. With land privatisation in Kenya Maasailand, many landowners covenant holdings to conservancies, displacing homesteads and small stock, concentrating them on boundaries, and constraining cattle management, mobility and grazing. Families unable to register land ownership are rendered landless 12. In Tanzania, land use in theory controlled by village governments is over-ridden by the state reallocating pastoral areas to outside investors 13,14. Across Maasailand, many rural poor find themselves with few or no rights to the land they live on, and increasingly excluded from resources central to livelihoods, despite laws being passed supposedly to increase tenure security. Nonetheless, in both countries, traditional Maasai resource management institutions persist, involving councils of elders and their liaison with warrior age groups.

- 1. **PD – Maasai, pastoralists dry season, Tanzania / Kenya**

Domestic water sources may use village boreholes or personal, hand-dug wells, but the main homestead is usually located within a day’s walk to and from permanent water for the herds, and in the dry season, cattle move back to this base. When dry seasons lengthen into drought and extreme resource scarcity, herders scout for and elders confer over areas with better forage and water access. Herding strategies are adjusted day to day through constant information sharing within social networks on key resources. Homesteads pool their livestock and herding labour to ensure difficult and dangerous movements can be carried out safely15.

During droughts, pastoralists seek to maintain access to rangeland resources beyond their homesteads and any immediate commons, leveraging social networks to find grazing. They make often difficult and dangerous long-distance treks including cross-border movements and passage through increasingly constrained corridors between croplands they must not damage and wildlife reserves they may not enter. Increasing privatisation of land and commercialisation in the market economy undermine customary reciprocal arrangements. Increasingly, access depends on payment, but information-sharing and collaboration remain critically important. To navigate ecological complexities and mobility within a fragmenting landscape, herders rely on cooperative information sharing through the channels built into social structure and process. The end of the dry season finds the herds in dangerously poor condition, depleted, vulnerable both to potentially toxic new plant growth, and to lethal hypothermia (even drowning) in imminent heavy rain along unpredictable stormtracks.

- 1. **PW – Maasai, pastoralists, Tanzania / Kenya, wet season**

During the wet season, herds disperse across the grazing lands in response to the abundant and widely distributed grazing and surface water. Transhumance takes the herds away from permanent water of rivers, swamps or highland drought refuges, to make the most of higher quality rainfed forage. During this wet season period of abundance, elders confer to delineate and set aside specific grazing areas for later dry season use. The elders communicate these restrictions and determine penalties to be imposed on any herders entering these reserved areas, while warrior agesets monitor and enforce respect for the grazing rules.

Hence, during dry seasons, pastoralists rely on cooperative knowledge sharing and social rules to manage unpredictable and dwindling resource availability. By contrast, during the wet season, communities display grazing governance enshrining management procedures to limit. In these complex situations, both types of rules (social and management) and governance systems apply simultaneously in a mosaic system 15.

1. **Traditional Amazonians**

The Traditional Amazonians are predominantly descendants of migrants who settled in the Amazon in the late 19th and early 20th centuries to work as rubber tappers – they do not include indigenous people16. They are sometimes called “caboclo” or traditional people17 Following the collapse of the rubber market in Brazil, they diversified their livelihoods by accessing areas once owned by rubber landlords to extract other resources such as fish, mammals, and nuts. In the 1990s, the Brazilian government began creating sustainable use protected areas to safeguard their livelihoods18. These areas, though belonging to the government, grant local people living permits under the condition that they implement their own sustainable resource governance system.

We looked at four types of governance structures in these areas:

- 1. **HAS – Traditional Amazonians, hunting small game in croplands**

Hunting is a key source of protein for the Traditional Amazonians, with most game being used for subsistence19. The ethnography description refers to the community reserve in Acre Extractive Reserves Riozinho da Liberdade and Alto Taruacá, and Sustainable Development Reserves Amanã and Mamirauá. In these regions, most households have customary privately owned areas of around 1 hectare with mainly cassava and other crops. Community members cannot access other households’ roçados without permission of the owner20.

Within the roçado areas is common to see the presence of small mammals and birds coming to consume the crops, concentrating high levels of biodiversity 21. In the areas analysed owners of the roçado do not allow people to hunt in these areas, meaning that hunting of these animals is exclusive to the land owners19. Harvested small mammals are consumed by family members usually within the same day to avoid spoiling. Authors have referred to animals in the roçado as Traditional Amazonians’ supermarket, which when they need a quick source of protein they can go to the roçados and hunt a small game19,22 The clear boundaries and rules make this case a private property regime with management rules.

- 1. **HLA – Traditional Amazonians, hunting large game, Brazil**

Large mammals is also another important source of protein for many local groups in the Amazon23. The ethnography description refers to the community reserve in Acre Extractive Reserves Riozinho da Liberdade and Alto Taruacá, and Sustainable Development Reserves Amanã and Mamirauá. Hunters, mostly men, tend to hunt in areas called “hunting centres'' in which all community members have access to it. There are no restrictions on when and how they access it. Local people may hunt alone or in group, but mostly men22. Hunting trips normally take a few days.

When large games are hunted, it is, the majority of the times shared among all community member19,22,24. How and with whom people share depends on several factors, such as overhunting or low abundances of large species, a strategy to prevent meat from spoiling due to lack of refrigeration and is a form of asserting power status19,23. This system represents a cooperative open access regime with social rules.

- 1. **BA – Traditional Amazonians, *Brazil nut* harvesting, Brazil**

The Brazil nut tree *(Bertholletia excelsa*), reach up to 50 meters tall and over 3 meters of diameter 25. It is also referred to as the Amazon nut tree or *castanhas* locally. This species can be found in non-flooded forest areas (terra firme), on nutrient-poor, well-drained utisol and exisol soils, and at elevations lower than 800 meters above sea level26. Brazilian nut trees thrive in areas with annual precipitation of 1400–2800 mm, 2–7 dry months, and less than 60 mm of rainfall each month 27.

Flowers of the brazil nut tree appear at the beginning of the rainy season (between November and January), varying between populations depending on rain distribution over the year. The entire blossoming season produces over 100,000 flowers on each tree. However, because of inadequate pollination, only 0.28 percent of all blossoms turn into fruits27. Fruits are produced once a year, although some trees do not produce at all some years. Success in blossoms is also dependent on natural flood patterns in the region.  Most trees produce about 100 fruits annually on average. Overall, Brazilian nut trees exhibit significant temporal fluctuation, with high output years frequently being followed by low production years.

Due to their nutritional benefits and quality, this species' nuts have historically been favoured and today represent a significant source of income for thousands of families in the region 25,28. Communities in the region have harvested Brazil nuts for thousands of years. Local groups harvest Brazil nut in partnership with rubber. Rubber is tapped from April to October, and the remaining period (November to March) they collect Brazil nuts 27.

The data on ethnography of the governance structure here refers to the Extractive Reserve Cazumbá-Iracema in the state of Acre29. In the reserve, Brazil nut harvesting is centred around colocações, which are forest land holding units of around 400 ha that were originally distributed according to the distribution of rubber trees. Each colocação is owned by individual households. There are no physical boundaries between colocações, but all residents clearly know where one property ends and another one starts.

The usufruct rights, which can be passed down both paternally and maternally, are primarily customary and highly valued. Harvesters, typically men, collect Brazil nuts that fall from the trees during the wet season, usually around 500 to 5000m away from their homes 29. Harvesters systematically search for fruits on the ground below the crown of the tree, to then open the fruit using a machete and then remove the seeds which are the “Brazil nuts”. Given that the trees have up to 40 meters, there is no way of harvesting it besides waiting for the fruits to fall. The collected nuts are put in large straw bags to be carried to a nearby settlement27. The system represents a customary private property system with management rules.

- 1. **AA – Traditional Amazonias, *arapaima* fishing, Brazil**

The arapaima (A*rapaima gigas*) are large scaled fish which can be a total length of three meters and weigh up to 200 kilos, giving them a high market price30. They occupy one of the highest trophic levels in the amazon aquatic system, alongside other predators like dolphins and caimans31. Their reproduction is linked to the flood water cycles with their peak reproduction occurring after the waters begin to rise and flood forests creating viable mating grounds. Adult fish must surface every 20 minutes to breathe and juveniles every 15, which in turn makes them easy targets for harpoon fishermen32. The fish are found in many areas of the Amazon floodplain 33 which is characterized by a seasonal flood pulse.

The ethnography data here comes mainly from the Sustainable Development Reserves Mamirauá and Amanã17,30–32,34,35. In the reserves, there are three main rules. 1) only people who are part of the management system can fish. None who is from outside the reserve is allowed to fish within the reserve. The lakes are overseen by community members and rangers of the reserve, who guard the areas from trespassing. 2) The quantity of fish the community is allowed to capture depends on the number of fish in the lakes. Before the fishing season, people use a traditional system to count the number of fish in each lake and estimate the total population of the area33,34. The number is submitted to the federal environmental agency who establish a fishing quota based on local and external factors, such as number of people in the community and people's experience in counting fish in the area, however, the quota tends to be around 25% to 30% 36,37. 3) The lakes in the area are divided into preservation, commercial use and self-consumption. Only lakes for commercial use and self-consumption. It is a system of common property regime with clear management rules.

1. **Pantaneiro fishers**

The Pantanal, known as the largest continuous wetland in the world, encompasses a vast area of over 179,300 km2 and covers areas of three countries (Brazil, Paraguay and Bolivia)38. It is characterised by a diverse combination of grasslands, savannas and forests that undergo seasonal flooding. Up to 80 percent of the Pantanal can experience periodic flooding as a result of rainfall runoff from surrounding highlands, facilitated by the gentle topography of the region39.

This seasonal north-south flood pulse gives rise to a pronounced seasonality within the ecosystem, leading to significant variations in productivity and resource availability between the dry and wet seasons39. Specifically, the wet season in the Pantanal is characterised by higher resource availability, both in terms of abundance and diversity, particularly for fish species and food availability. The dry season is mainly from April to October and the wet season is from November to March, yet since the flood pulse moves from north to south each region will experience it at different times. Food availability and biodiversity move according to the changes on flood dynamics.

Flood pulses also influence the movement and location of floating vegetation mats which block and open different water bodies40. These vegetation mats are composed of aquatic macrophytes that cut off large channels connected to the lakes. They constantly change accessibility to fishers, who need to nevegate the unpredictability of access dictated by the flood dynamics and changes on access to lakes 41.

- 1. **FP - Pantaneiros, fishing, Brazil**

Fishing is the main livelihood for over 70% of local fishery communities in the Pantanal (R. M. Chiaravalloti, 2019). Extended families occupy different sites throughout the floodplain. Groups of four or five extended families, normally bounded through kinship, form a community.

The main ecological challenge facing the pantaneirocommunities is the temporal and spatial unpredictability in the distribution of fish. This is largely a result of the north-south flood pulse in the Pantanal. ﻿Due to the slight gradient of the terrain in the Pantanal (2–3 cm/km north to south; 5–25 cm/km east to west) the flood pulse takes 3–4 months to pass through and is highly variable from year to year 43. Additionally, large quantities of floating vegetation mats move freely throughout the floodplain, continually blocking and opening different water bodies 44.

For small-scale *pantaneiro* fishers, this results in a system that is highly unpredictable: on average, fishing grounds stay available and profitable for no longer than five days. Fishers survive by sharing information about productive fishing grounds with one another and by moving to fish in the same place (Rafael Morais Chiaravalloti & Dyble, 2019). The information is shared and discussed during ice-tea drinking sessions (“*tereré*”), of which several are held each day. However, the openness and reciprocity shown by people from the same community does not extend to people from outside their community, with whom neither information nor fishing grounds are shared (R. M. Chiaravalloti, 2019). To avoid any kind of contact (e.g. outsiders seeing where they are going), the community has a clear territory which they will defend if those fishers from other communities trespass its limits. Ethnographic research has recorded several knife fights related to this conflict (R. M. Chiaravalloti, 2019).

The system we see in the Pantanal involves social rules but not management rules. The socio-ecological system we see includes some features that are typical of an *open* property regime such as high levels of mobility and a lack of clear boundaries between community members (R. M. Chiaravalloti, 2019). However, we also see bounded social groups within which individuals cooperate extensively according to a shared set of social norms.

1. **Garifuna fishers**

The Garifuna community descend from West African escaped and marooned slaves, who comingled with native Arawak on the Caribbean Island of St. Vincent (Craven, 2006; Murphy-Graham, 2005). In 1797 the Garifuna were exiled from St. Vincent by the British and settled in Roatan, Honduras, and then resettled in Punta Gorda, on the Honduran mainland (Murphy-Graham, 2005). The majority of Garifuna communities are in Honduras, within the Atlantida department, in approximately 40 settlements located on the mainland and islands (Bown et al., 2013), communities are also situated in Belize, Guatemala, and Nicaragua (Murphy-Graham, 2005). A rigid gender division of labour is observed within Garifuna communities, with women responsible for childcare and other household chores, and tending subsistence agriculture plots, while men are primarily engaged in fishing activities (Murphy-Graham, 2005; 2008).

- 1. **FH – Garifuna, fishing, Honduras**

Coral reef associated fisheries are the primary target species of Garifuna fishermen, which underpin the food security and livelihoods of these communities (Brondo & Bown, 2011; Canty et al., 2019; Canty & Deichmann 2021). Reef fisheries are accessed by small wooden vessels with low horsepower engines or paddle (Chollett et al., 2014). Fishermen move freely throughout open-access fishing areas within their range, and information is shared freely between Garifuna fishermen, such as which fishing grounds are productive upon return from fishing excursions. However, this information is not shared with other ethnic groups who share fishing grounds in open-access areas along the Honduran northshore. Fishing restrictions are in place, in 1993 the Cayos Cochinos Archipelago Natural Marine Monument was designated, with no community consultation, which limited Garifuna fishing activities (Bown et al., 2013). The marine protected area was implemented due to decreasing fish populations, with observed catches considered representative of overexploitation (Guzmán & Jácome, 1998). However, after several campaigns subsistence fishing activities for Garifuna were reinstated within the boundaries of the marine monument, using hook and line only (Guzmán & Jácome, 1998). Garifuna fishermen understand the needs for protecting marine resource and perceive that many commercially important species have increased since protections have been implemented and enforced (Barahona & Guzmán, 1998). More recently communities in the Tela Bay area, with help from NGOs, established clear management rules within their fishing system, limiting certain areas from spearfishing and line fishing 46.

1. **Agta hunter-gatherers**

With a population of around 9,000 individuals, the Agta are among several groups that have recognition in the Philippines as ‘indigenous peoples (IPs)’. The Agta live in north-eastern Luzon, Philippines and have an economy primarily based on hunting, fishing and gathering wild plant foods and honey. These foraging activities are supplemented with some commercial foraging (e.g. for rattan), agriculture, and wage labour. There is significant variation in engagement in foraging between Agta communities, with this case study primarily concerning the ~1,000 Agta living in Palanan municipality in c.2013.

Hunting among the Palanan Agta is done in the dense tropical forest of the Sierra Madre mountain range. The dominant target species are the Philippine brown deer (*cervus mariannus*) and the Philippine warty pig (*sus philippinensis*), which hold significant importance as game animals. The Agta prioritise hunting pigs due to their preference for pig meat over deer meat 47. The region experiences a seasonal cycle of environmental change, characterised by alternating rainy and dry seasons, with tropical storms usually concentrated between July and October. However, the precise dynamics of the climate in the area remain uncertain, highlighting its complex nature.

The Agta people's choice of hunting location is influenced by factors such as the season, the relative abundance of game in different areas, and the duration of a hunter's absence from home. Hunters dwelling near rivers indicate that venturing deeper into the forest increases their likelihood of encountering larger game animals. Hunting during the wet season is preferred as it yields better returns, attributed to the availability of fruits in the late dry season, leading to healthier and fatter game. Additionally, the moist forest floor facilitates tracking game, while hunters perspire less during the wet months, making them less detectable to game. In contrast, during the dry season, game is said to retreat to higher elevation areas, requiring greater effort to access 48.

The occurrence of heavy rains or typhoons renders both hunting and fishing activities impossible for the Agta 48. Moreover, they consistently remark that wild pigs and deer, in particular, have become increasing scarce in recent decades 48. Location of game within hunting grounds is uncertain at all times.

The Agta typically live in small groups (typically around 20 adults) of fluid membership, with households frequently moving between locations 49. Extensive within-group cooperation occurs in foraging, childcare, and food sharing 50,51. Cooperative food sharing is particularly essential in mitigating daily shortfalls in hunting or fishing success, as individual families would struggle to survive without the risk-reduction reciprocity afforded by sharing. Large package size foods (principally meat and honey) are widely shared with other households, with sharing promoted by social norms and an overall ethos of egalitarianism.

While the Agta primarily engage in hunting for larger game found in the forest, such as wild pigs, deer, and fish, their social and economic interactions extend beyond their own community. They actively engage with non-Agta farmers and loggers, relying on trade as a supplementary means of sustenance alongside hunting. Despite their long-standing presence in the region, the Agta face threats such as deforestation resulting from logging activities and the expansion of agriculture, which pose risks to their survival. They have experienced relocations and shifts due to these threats, leading to changes in their settlements and lifestyles. These complex social dynamics and environmental challenges significantly influence the hunting practices and livelihoods of the Agta in the Philippines.

The Agta hold beliefs that hunting success is not solely dependent on a hunter's skill, wildlife abundance, and weather conditions but is also influenced by supernatural forces. Ancestor spirits and nature spirits, recognized as two primary classes of spirits, are believed to roam the environment and have an impact on hunting outcomes 48.

- 1. **HP – Agta, hunting, Philippines**

The natural resource governance practices of hunting among the Agta involve a system where permission is sought before foraging in the territory of other groups. This cooperative open-access system relies on bounded social groups with clear social norms. Despite the absence of formal management rules due to ecological factors and low population density, sustainability is maintained.

Each residential group's hunting radius is limited to the streambed of a major river and its tributaries. While hunters may receive permission to enter the hunting ranges of neighbouring groups, they are most familiar with their own watershed and that of their families. Within these areas, hunters possess detailed and explicit geographical knowledge. The Agta permit hunting in most areas, except on and immediately around burial grounds.

The duration of hunting trips varies, ranging from less than an hour to several days and nights.

The majority of the meat obtained through hunting is consumed within the residential group. It is divided into pieces, and a pile of meat chops is prepared for each household in the camp. Excluding certain households from the meat distribution or rejecting an offered share indicates strained relations within the community. Additionally, if there are close relations with non-Agta individuals nearby, they may also be given a portion of the catch as if they were part of the Agta households.

When a large deer or wild pig is caught, it is possible for a portion of the catch to be traded with neighbouring non-Agta people. Typically, the hind legs are set aside specifically for this purpose. The Agta hunters of the Northern Sierra Madre Natural Park utilize a combination of hunting tools, including bow and arrow, shotguns, and traps. However, the specific choice of tools and hunting strategies varies depending on climatic and environmental conditions, as well as individual and group preferences.

- 1. **Warufiji fishers**

The Rufiji River is the longest river in Tanzania, draining some 20% of the country’s land area through its major tributaries 52. Passing through Stiegler’s Gorge in the Selous Game Reserve, the river runs eastwards for ~180 km through Rufiji District, along a valley and into the Rufiji Delta at the Indian Ocean, supporting the largest mangrove wetland in East Africa. A vast floodplain (~1450km2 in size) occupies the valley bottom, characterised by a mosaic of former river channels, levees and shallow depressions, and eight major permanent lakes 52.

The Rufiji River has an annual flooding pattern, beginning around December and generally reaching peak water levels in April, but the timing, duration and level of flooding is highly variable and difficult to predict 52. When water levels do exceed a certain threshold, riverine water flows into the permanent lakes through temporary channels. The connection can extend from a few days to several weeks, allowing exchange of water, suspended matter and biological material, including fishes 53 There are frequently years with no floods, however and water availability will be further affected by climate change and the recent completion of the Julius K. Nyerere megahydropower dam at Stiegler’s Gorge 54.

Local livelihood strategies are dominated by farming (primarily maize and rice) and fishing. Fishing occurs year-round but with strong seasonal changes in effort dictated by the flood-cycle 55. Most commercial fishing activity by full-time fishers takes place in the permanent lakes over the dry season. These men are typically district residents who work on 4-man, 2 canoe teams running seine nets. Lakes with the longest and most recent connections to the river support the most productive fisheries, and full-time fishers move often to access the best fishing opportunities 56.

- 1. **RR – Warufiji, wet season floodplain fishing**

Fishing on the floodplain at high water is largely limited to subsistence catches from gill nets set out on residents’ flooded fields. The most productive floodplain fishing happens as waters are rising or falling, when fish migrate through temporary channels 53. Fishing in the temporary ponds continues into the dry season as fish become stranded there; high levels of vegetation prevent the use of most nets, and people may instead use traditional fishing baskets and weirs. Very little fishing occurs in the Rufiji River itself because of treacherous waters, submerged logs and dangerous wildlife ( crocodiles and hippos) 53

Men dominate fishing activities but women also fish on occasion for home consumption 55,56. Fisheries are generally unselective as to species or size, and although a diversity of species are consumed and sold, a few predominate: *pele* (*Citharinus congicus*), *kumba* (*Oreochromis urolepis*), *ngocho* (*Labeo congoro*), *kambale* (*Clarias gariepinus*) and *kogo* (*Synodontis rukwaensis*) 55,56.

- 1. **RL – Warifiji, fishing lakes, Tanzania;**

At least eight ethnic groups inhabit the floodplain, referred to collectively as the Warufiji by local residents. The district experienced major social upheaval in 1968, when all floodplain inhabitants were forcibly resettled into new villages on the river terraces. Although ostensibly undertaken to protect the population from extreme floods, the move served primarily to advance President Nyerere’s vision for a new model of African socialism (‘*Ujamaa*’) 57.

Before the resettlement, people lived in clan groups, with those clans adjacent to a pond responsible for maintaining relations with its water spirits 58. Collective fishing expeditions organised in the dry season were critical for ensuring food security, with adult men cooperating to build large reed fishing weirs, moving these across shrinking ponds to corral fish. The catch was shared with widows, the elderly, and others unable to fish. A pond could only be fished with permission from the clan patriarch, and in return that clan would expect their own requests to fish at another pond to be reciprocated. In this way the system supported mobility, helping people to deal with the unpredictable nature of the floods and fish availability across seasons and years.

After resettlement, however, people no longer lived adjacent to the ponds and could not monitor access. The increasing use of nylon nets, by which individuals could fish on their own and keep the catch for themselves, further accelerated the decline of traditional collective fishing and respect for communal management systems 53,58.

Today, temporary floodplain ponds essentially only rules rules around information and resource sharing. Fisheries resources in the main river channel move freely throughout the area adapting to changes on resource availability and distribution. The more predictable (i.e., geographically stable and productive) temporary river channels, however, are managed essentially as private property; fishers must ask permission of field owners and/or previous site users before setting any traps. On the permanent lakes, although villages have in place numerous bylaws these are difficult to implement due to a lack of district support and local enforcement capacity, together with persisting attachment to the tradition of reciprocal access 58. In any case, many fishers recognise that it is not fishing effort but rather flooding patterns that play the most important role in determining the health of local fisheries, and why the potential impacts of the Nyerere mega-dam are a cause of serious concern.

1. Homewood, K. *Ecology of African Pastoralist Societies*. (James Currey, 2008).

2. Homewood, K. Pastoralists, environment and development in East African rangelands. *Environment and Population Change* 311–322 Preprint at (1994).

3. Potkanski, T. *Property Concepts, Herding Patterns and Management of Natural Resources Among the Ngorongoro and Salei Maasai of Tanzania*. (1994).

4. Homewood, K. & Rodgers, W. A. *Maasailand Ecology : Pastoralist Development and Wildlife Conservation in Ngorongoro, Tanzania*. (Cambridge University Press, 1991).

5. Hughes, L. *Moving the Maasai*. (Palgrave Macmillan UK, London, 2006). doi:10.1057/9780230246638.

6. Galaty, J. G. Grounding Pastoralists: Law, Politics, and Dispossession in East Africa. *Nomad People* **3**, 56–73 (1999).

7. Homewood, K. M. “They Call It Shangri-La”: Sustainable Conservation, or African Enclosures? *The Anthropology of Sustainability* 91–109 Preprint at https://doi.org/10.1057/978-1-137-56636-2_6 (2017).

8. Shivji, I. G. *Not Yet Democracy: Reforming Land Tenure in Tanzania*. (1998).

9. Shivji, I. G. Problems of land tenure in Tanzania. A review and appraisal of the Report of the Land Commission of Inquiry into Land Matters, 1992. in *National Land Policy Workshop* (Arusha, Tanzania, 1995).

10. Pas, A., Watson, E. E. & Butt, B. Land tenure transformation: The case of community conservancies in northern Kenya. *Polit Geogr* **106**, 102950 (2023).

11. Montalvo, D. M. Statement by Mr. Dario Mejia Montalvo, Chairperson of the UN Permanent Forum on Indigenous Issues with reference on the eviction of Maasai people from the Ngorongoro Conservation Area in Tanzania. *United Nations Permanent Forum on Indigenous Issues* (2002).

12. Bedelian, C., Ogutu, J. O., Homewood, K. & Keane, A. Evaluating the determinants of participation in conservancy land leases and its impacts on household wealth in the Maasai Mara, Kenya: Equity and gender implications. *World Dev* **174**, 106442 (2024).

13. Nelson, F. *The Evolution and Impacts of Community-Based Ecotourism in Northern Tanzania*. (2004).

14. Igoe, J. Human rights, conservation and the privatization of sovereignty in Africa – a discussion of recent changes in Tanzania. *Policy Matters* **15**, 241–254 (2007).

15. Chiaravalloti, R. M., Homewood, K. & Dyble, M. Sustainability of social–ecological systems: The difference between social rules and management rules. *Conserv Lett* **14**, (2021).

16. de Magalhães Lima-Ayres, D. The Social Category Caboclo: history, social organisation, identity and outsider’s social Solimoes) classification of the rural population of an Amazonian region (The Middle Solimoes). (Cambridge, 1992). doi:https://doi.org/10.17863/CAM.19981.

17. de Magalães Lima, D. A Construção Histórica Do Termo Caboclo. *Novos Cadernos NAEA* **2**, 5–32 (1999).

18. Allegretti, M. A construção social de políticas públicas: Chico Mendes e o movimento dos seringueiros. *Desenvolvimento e Meio Ambiente* **18**, 39–59 (2008).

19. Valle Nunes, A., Guariento, R. D., Santos, B. A. & Fischer, E. Wild meat sharing among non-indigenous people in the southwestern Amazon. *Behav Ecol Sociobiol* **73**, (2019).

20. Lira, T. de M. & Chaves, M. do P. S. R. Comunidades Ribeirinhas na Amazônia: organização sociocultural e política. *Interações (Campo Grande)* (2016) doi:10.20435/1518-70122016107.

21. Padoch, C. & Pinedo‐Vasquez, M. Saving Slash‐and‐Burn to Save Biodiversity. *Biotropica* **42**, 550–552 (2010).

22. Nunes, A. V., Oliveira-Santos, L. G. R., Santos, B. A., Peres, C. A. & Fischer, E. Socioeconomic Drivers of Hunting Efficiency and Use of Space By Traditional Amazonians. *Hum Ecol* **48**, 307–315 (2020).

23. Nunes, A. V., Peres, C. A., Constantino, P. de A. L., Fischer, E. & Nielsen, M. R. Wild meat consumption in tropical forests spares a significant carbon footprint from the livestock production sector. *Sci Rep* **11**, 19001 (2021).

24. El Bizri, H. R. *et al.* Social and Biological Correlates of Wild Meat Consumption and Trade by Rural Communities in the Jutaí River Basin, Central Amazonia. *J Ethnobiol* **40**, 183–201 (2020).

25. Brouwer, R. G. *et al.* Establishment success of Brazil nut trees in smallholder Amazon forest restoration depends on site conditions and management. *For Ecol Manage* **498**, (2021).

26. Wadt, L. H. O., Kainer, K. A. & Gomes-Silva, D. A. P. Population structure and nut yield of a Bertholletia excelsa stand in Southwestern Amazonia. *For Ecol Manage* **211**, 371–384 (2005).

27. Zuidema, P. Alle. *Ecology and Management of the Brazil Nut Tree (Bertholletia Excelsa)*. (PROMAB, 2003).

28. Peres, C. A. *et al.* Demographic Threats to the Sustainability of Brazil Nut Exploitation. *Science (1979)* **302**, 2112–2114 (2003).

29. Ubiali, B. & Alexiades, M. Forests, Fields, and Pastures: Unequal Access to Brazil Nuts and Livelihood Strategies in an Extractive Reserve, Brazilian Amazon. *Land (Basel)* **11**, (2022).

30. de Magalhões Lima, D. & Peralta, N. Developing Sustainability in the Brazilian Amazon: Twenty Years of History in the Mamirauá and Amanã Reserves. *J Lat Am Stud* 1–29 (2017) doi:10.1017/S0022216X17000414.

31. Lima de Queiroz, H. Artisanal Fisheries of Pirarucu at the Mamirauá Ecological Station. *Advances in Economic Botany* **13**, 83–99 (1999).

32. Sautchuk, C. E. O arpão e o anzol: técnica e pessoa no estuário do Amazonas. 402 Preprint at (2007).

33. Castello, L., Viana, J. P., Watkins, G., Pinedo-Vasquez, M. & Luzadis, V. A. Lessons from Integrating Fishers of Arapaima in Small-Scale Fisheries Management at the Mamirauá Reserve, Amazon. *Environ Manage* **43**, 197–209 (2009).

34. Castello, L., Stewart, D. J. & Arantes, C. C. Modeling population dynamics and conservation of arapaima in the Amazon. *Rev Fish Biol Fish* **21**, 623–640 (2011).

35. Castello, L., McGrath, D. G. & Beck, P. S. A. Resource sustainability in small-scale fisheries in the Lower Amazon floodplains. *Fish Res* **110**, 356–364 (2011).

36. Campos-Silva, J. V. & Peres, C. A. Community-based management induces rapid recovery of a high-value tropical freshwater fishery. *Sci Rep* **6**, 1–13 (2016).

37. Campos-Silva, J. V *et al.* Sustainable-use protected areas catalyze enhanced livelihoods in rural Amazonia. *Proceedings of the National Academy of Sciences* **118**, e2105480118 (2021).

38. Tomas, W. M. *et al.* Sustainability Agenda for the Pantanal Wetland: Perspectives on a Collaborative Interface for Science, Policy, and Decision-Making. *Trop Conserv Sci* **12**, (2019).

39. Junk, W. J., da Cunha, C. N., da Silva, C. J. & Wantzen, K. M. The Pantanal: A large South American wetland and its position in limnological theory. *The Pantanal: Ecology, biodiversity and sustainable management of a large neotropical seasonal wetland* 23–44 Preprint at (2011).

40. Pott, V. J. & Pott, A. Species diversity, distribution and biomass of aquatic macrophytes of the Pantanal. *The Pantanal: ecology, biodiversity and sustainable management of a large neotropical seasonal wetland* 257–279 Preprint at (2011).

41. Chiaravalloti, R. M., Bolzan, F., Roque, F. D. O. & Biswas, S. Ecosystem services in the floodplains: Socio-cultural services associated with ecosystem unpredictability in the Pantanal wetland, Brazil. *Aquat Ecosyst Health Manag* **25**, (2022).

42. Chiaravalloti, R. M. The Displacement of Insufficiently ‘Traditional’ Communities: Local Fisheries in the Pantanal. *Conservation and Society* **17**, 173 (2019).

43. Junk, W. J. *et al.* Biodiversity and its conservation in the Pantanal of Mato Grosso, Brazil. *Aquat Sci* **68**, 278–309 (2006).

44. Pott, V. J., Pott, a, Lima, L. C. P., Moreira, S. N. & Oliveira, a K. M. Aquatic macrophyte diversity of the Pantanal wetland and upper basin. *Braz J Biol* **71**, 255–263 (2011).

45. Chiaravalloti, R. M. & Dyble, M. Limited open access in socioecological systems: How do communities deal with environmental unpredictability? *Conserv Lett* **12**, e12616 (2019).

46. Rivera, A., San Martin-Chicas, J. & Myton, J. Transitioning to co-management in Caribbean reef fisheries: Tela Bay case study. *Sustain Sci* **16**, 1233–1250 (2021).

47. Schrire, C. *Past and Present in Hunter Gatherer Studies*. (Routledge, 2016). doi:10.4324/9781315422930.

48. Minter, T. The Agta of the Northern Sierra Madre. Livelihood strategies and resilience among Philippine hunter-gatherers. (Leiden University, 2010).

49. Dyble, M., Migliano, A. B., Page, A. E. & Smith, D. Relatedness within and between Agta residential groups. *Evol Hum Sci* **3**, e49 (2021).

50. Dyble, M. *et al.* Networks of Food Sharing Reveal the Functional Significance of Multilevel Sociality in Two Hunter-Gatherer Groups. *Current Biology* **26**, 2017–2021 (2016).

51. Major-Smith, D. *et al.* Cooperation and partner choice among Agta hunter-gatherer children: An evolutionary developmental perspective. *PLoS One* **18**, e0284360 (2023).

52. Duvail, S. & Hamerlynck, O. The Rufiji River flood: plague or blessing? *Int J Biometeorol* **52**, 33–42 (2007).

53. Hamerlynck, O. *et al.* To connect or not to connect? Floods, fisheries and livelihoods in the Lower Rufiji floodplain lakes, Tanzania. *Hydrological Sciences Journal* **56**, 1436–1451 (2011).

54. Duvail, S. *et al.* The changing hydro-ecological dynamics of rivers and deltas of the Western Indian Ocean: Anthropogenic and environmental drivers, local adaptation and policy response. *Comptes Rendus. Géoscience* **349**, 269–279 (2017).

55. Moreau, M. A. & Garaway, C. J. “Fish Rescue us from Hunger”: the Contribution of Aquatic Resources to Household Food Security on the Rufiji River Floodplain, Tanzania, East Africa. *Hum Ecol* **46**, 831–848 (2018).

56. Moreau, M. A. & Garaway, C. J. Trading Fast and Slow: Fish Marketing Networks Provide Flexible Livelihood Opportunities on an East African Floodplain. *Front Sustain Food Syst* **5**, (2021).

57. Hoag, H. J. & Öhman, M.-B. Turning Water into Power: Debates over the Development of Tanzania’s Rufiji River Basin, 1945-1985. *Technol Cult* **49**, 624–651 (2008).

58. Moreau, M.-A. ‘The lake is our office’: Fisheries resources in rural livelihoods and local governance on the Rufiji River floodplain, Tanzania. . (UCL, London, 2014).
